# Supplementary material for: Control of selective and catalyst-free growth of Sb2Te3 and Te nanowires from sputter-deposited Al-Sb-Te thin films
Source: Royal Society of Chemistry journal article supplement (doi:10.1039/c2ce25290b), 2012-01-01
Supplement: c2ce25290b.pdf [file c2ce25290b.pdf]

Supporting Information for

## Control of selective and catalyst-free growth of $\text{Sb}_2\text{Te}_3$ and Te nanowires from sputter-deposited Al-Sb-Te thin films

By Byeong Geun Kim,<sup>a</sup> Byung-Sung Kim,<sup>b</sup> Seong-Min Jeong,<sup>c</sup> Soon-Mok Choi,<sup>c</sup> Dongmok Whang,<sup>b</sup> Hong-Lim Lee<sup>a</sup> and Sang-Hoon Hyun<sup>\*a</sup>

<sup>a</sup> Department of Materials Science and Engineering, Yonsei University, Seoul 120-749, Korea

<sup>b</sup> School of Advanced Materials Science & Engineering and Sungkyunkwan Advanced Institute of Nanotechnology, Sungkyunkwan University, Suwon 440-746, Korea

<sup>c</sup> Korea Institute of Ceramic Engineering and Technology (KICET), Seoul 153-801, Korea

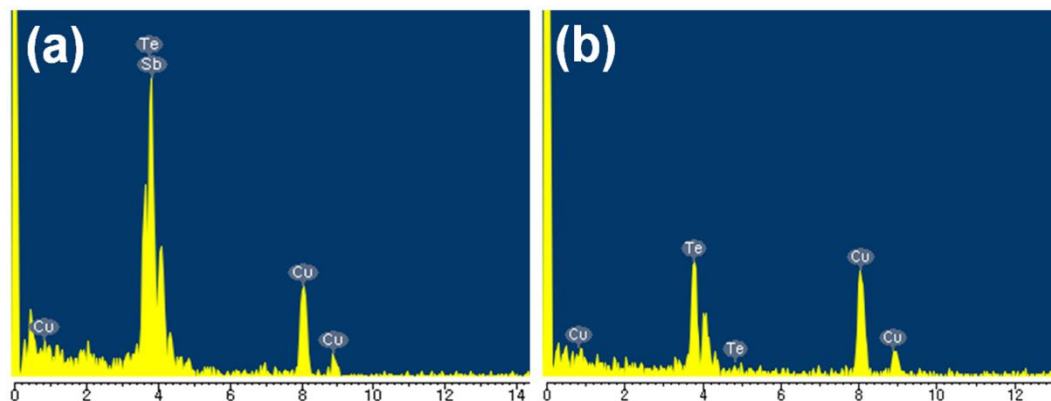

**Fig. S1** EDS spectra obtained from the tips of (a) STNW and (b) TeNW.

The Cu peaks are generated by the copper grid which supports the NWs.

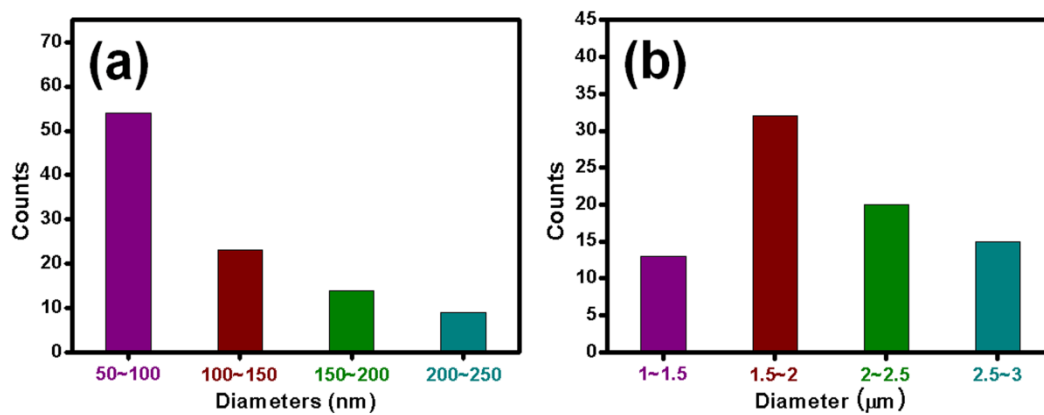

**Fig. S2** Histograms of the measured diameters of (a) STNWs and (b) TeNWs, which were obtained from AST-3 annealed at 250 °C under N<sub>2</sub> and O<sub>2</sub> gas atmosphere, respectively.
